# Supplementary material for: CD151 expression marks atrial- and ventricular- differentiation from human induced pluripotent stem cells
Source: PubMed Central journal article supplement (PMC10901864; doi:10.1038/s42003-024-05809-2), 2024-02-28
Supplement: 42003_2024_5809_MOESM2_ESM.pdf [file 42003_2024_5809_MOESM2_ESM.pdf]

**Supplementary information for**

**CD151 expression marks atrial- and ventricular- differentiation from  
human induced pluripotent stem cells**

Supplementary Figures

Figure S1

Figure S2

Figure S3

Figure S4

Figure S5

Figure S6

Figure S7

Figure S8

Supplementary Tables

Supplementary Table 1

Supplementary Table 2

Supplementary Table 3

# Figure S1

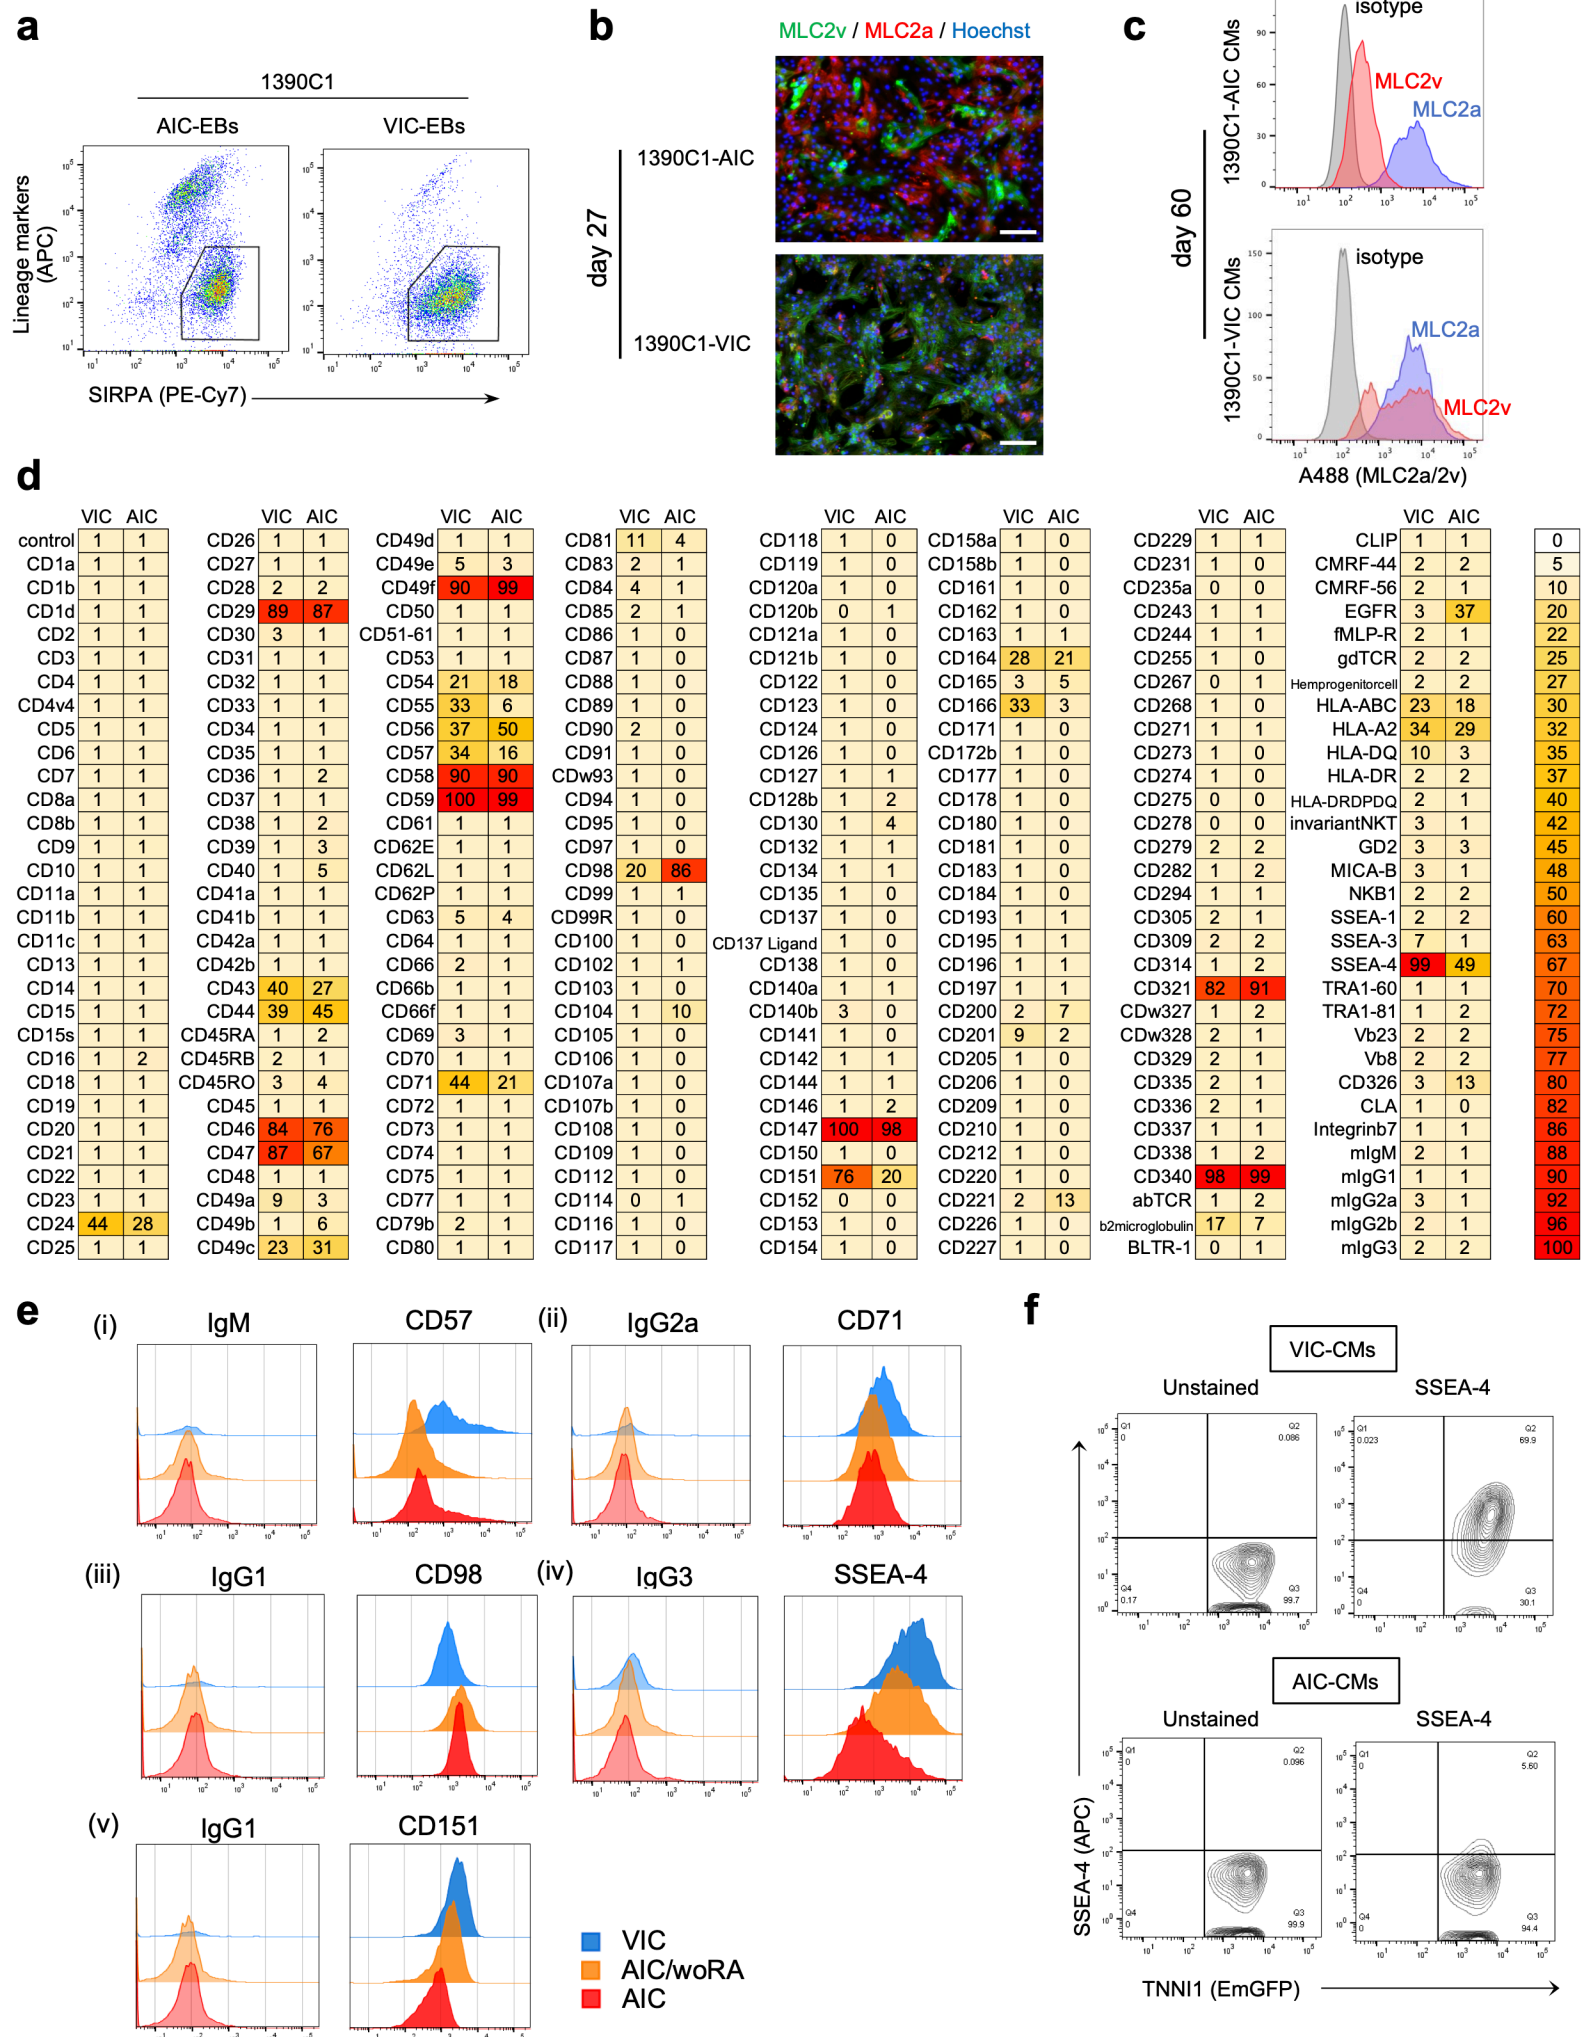

**Figure S1. Cardiac differentiation in an independent hiPSC line and cell surface marker screening, related to Figure 1.**

(a) Representative flow cytometry images of day 20 AIC- and VIC-EBs stained with SIRPA and other lineage markers (CD31, CD49a, CD90, and CD140b) in the 1390C1 hiPSC line. The SIRPA<sup>+</sup>/CD31<sup>-</sup>/CD49a<sup>-</sup>/CD90<sup>-</sup>/CD140b<sup>-</sup> population was gated as CMs. (b) Immunofluorescence analysis of MLC2v (green), MLC2a (red), and Hoechst (blue) in day-27 AIC- and VIC-CMs derived from the 1390C1 hiPSC line. Scale bars = 100  $\mu$ m. (c) Histogram showing expression of MLC2a and 2v in AIC- and VIC-CMs on day 60. (d) Expression frequencies of all markers in TNNI1<sup>+</sup> CMs, analyzed using the Lyoplate Human Cell Surface Marker Screening Panel. (e) Flow cytometry histograms of CD57 (i), CD71 (ii), CD98 (iii), SSEA-4 (iv), and CD151 (v) with isotype control expressions in AIC-, AIC/woRA-, and VIC-CMs. (f) Representative flow cytometry images of day-20 AIC- and VIC-CMs stained with SSEA-4 in the TNNI1-EmGFP reporter hiPSC line.

**Figure S2**

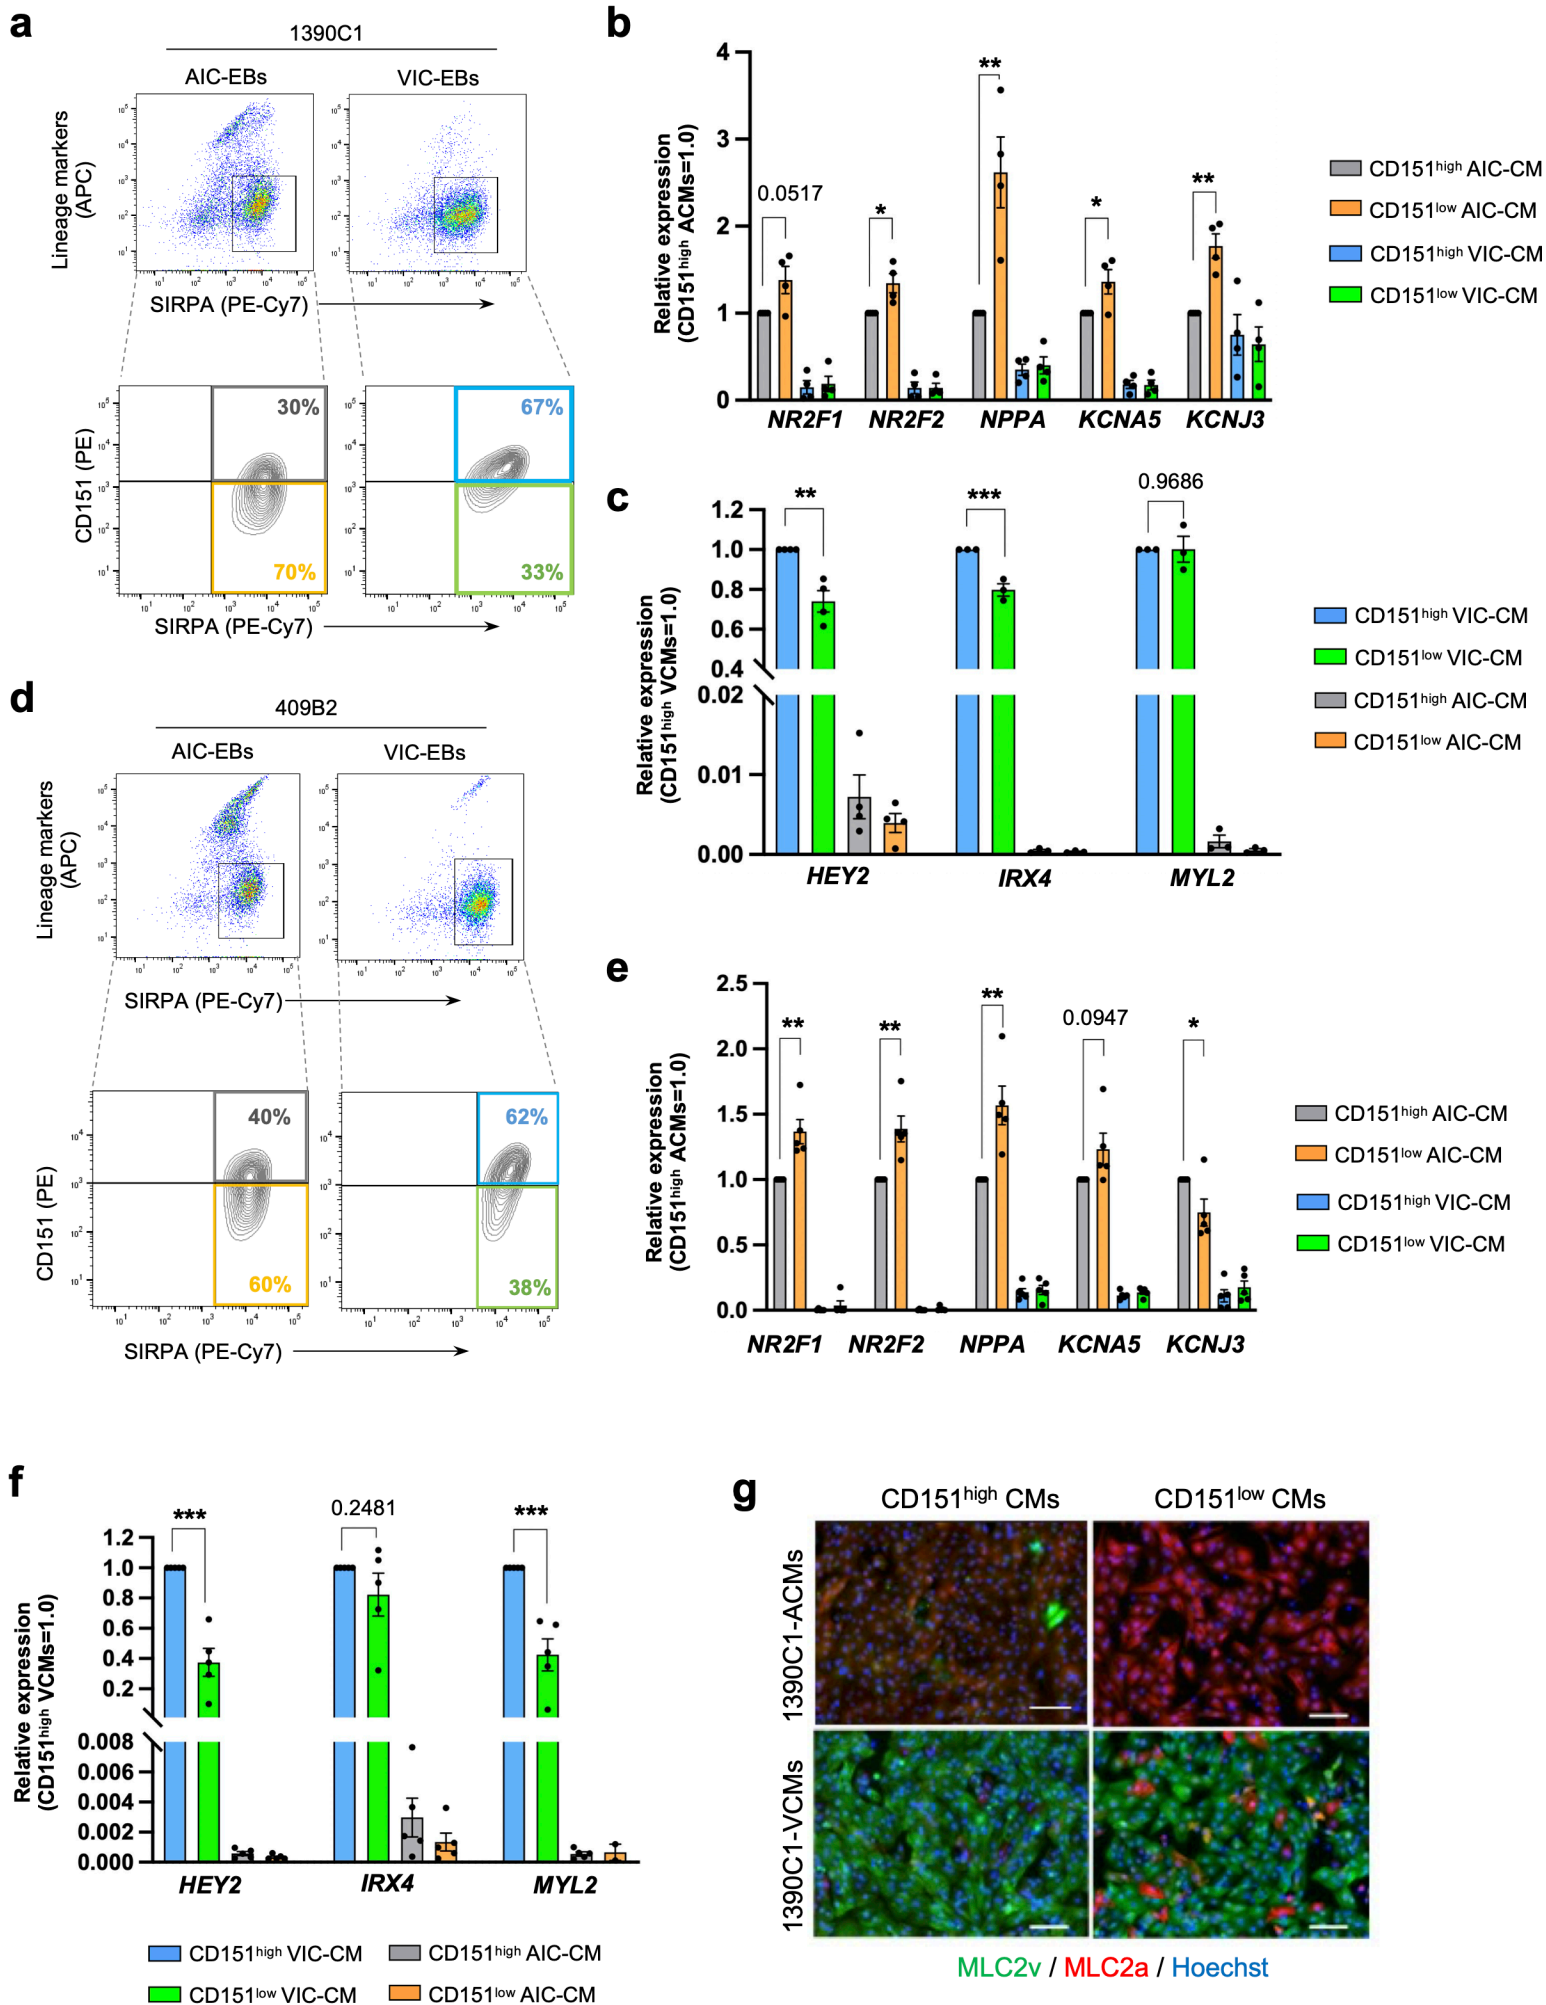

**Figure S2. Atrial- and ventricular-related gene expression in CMs derived from the 1390C1 and 409B2 hiPSC lines, related to Figure 1.**

(a) Representative flow cytometry images of day 20 AIC- and VIC-EBs derived from the 1390C1 hiPSC line and stained with SIRPA, CD31, CD49a, CD90, CD140b, and CD151. The SIRPA<sup>+</sup>/CD31<sup>-</sup>/CD49a<sup>-</sup>/CD90<sup>-</sup>/CD140b<sup>-</sup> population was gated as CMs (top), following which CD151 expression was analyzed in SIRPA<sup>+</sup>/CD31<sup>-</sup>/CD49a<sup>-</sup>/CD90<sup>-</sup>/CD140b<sup>-</sup> cells (bottom). (b) Relative expression of atrial-related genes in CD151<sup>low</sup> AIC-CMs and CD151<sup>high/low</sup> VIC-CMs compared to those in CD151<sup>high</sup> AIC-CMs derived from the 1390C1 hiPSC line. n=4 independent differentiation experiments per group. Data are expressed as mean  $\pm$  SEM. Statistical analysis was conducted between CD151<sup>high</sup> AIC-CM and CD151<sup>low</sup> AIC-CM using the unpaired two-tailed t-test. \* p < 0.05 and \*\* p < 0.01. (c) Relative expression of ventricular-related genes in CD151<sup>low</sup> VIC-CMs and CD151<sup>high/low</sup> AIC-CMs compared to those in CD151<sup>high</sup> VIC-CMs derived from the 1390C1 hiPSC line. n=3–4 independent differentiation experiments per group. Data are expressed as mean  $\pm$  SEM. Statistical analysis was conducted between CD151<sup>high</sup> VIC-CM and CD151<sup>low</sup> VIC-CM using the unpaired two-tailed t-test. \*\* p < 0.01; \*\*\* p < 0.001. (d) Representative flow cytometry images of day-29 AIC- and VIC-EBs derived from the 409B2 hiPSC line and stained with SIRPA, CD31, CD49a, CD90, CD140b, and CD151. The SIRPA<sup>+</sup> population negative for the lineage markers (CD31, CD49a, CD90, and CD140b) was gated as CMs (top) and analyzed for CD151 expression (bottom). (e) Relative expression of atrial-related genes in CD151<sup>low</sup> AIC-CMs and CD151<sup>high/low</sup> VIC-CMs compared to those in CD151<sup>high</sup> AIC-CMs derived from the 409B2 hiPSC line. n=5 independent differentiation experiments per group. Data are expressed as mean  $\pm$  SEM. Statistical analysis was conducted CD151<sup>high</sup> AIC-CM and CD151<sup>low</sup> AIC-CM using the unpaired two-tailed t-test. \* p < 0.05 and \*\* p < 0.01. (f) Relative expression of ventricular-related genes in CD151<sup>low</sup> VIC-CMs and CD151<sup>high/low</sup> AIC-CMs compared to that in CD151<sup>high</sup> VIC-CMs derived from the 409B2 hiPSC line. n=5 independent differentiation experiments per group. Data are expressed as mean  $\pm$  SEM. Statistical analysis was conducted CD151<sup>high</sup> VIC-CM and CD151<sup>low</sup> VIC-CM using the unpaired two-tailed t-test. \*\*\* p < 0.001. (g) Representative immunofluorescence images of MLC2v (green), MLC2a (red), and Hoechst (blue) in CD151<sup>high/low</sup> AIC-CMs and in CD151<sup>high/low</sup> VIC-CMs on day 27. Scale bars = 100  $\mu$ m.

# Figure S3

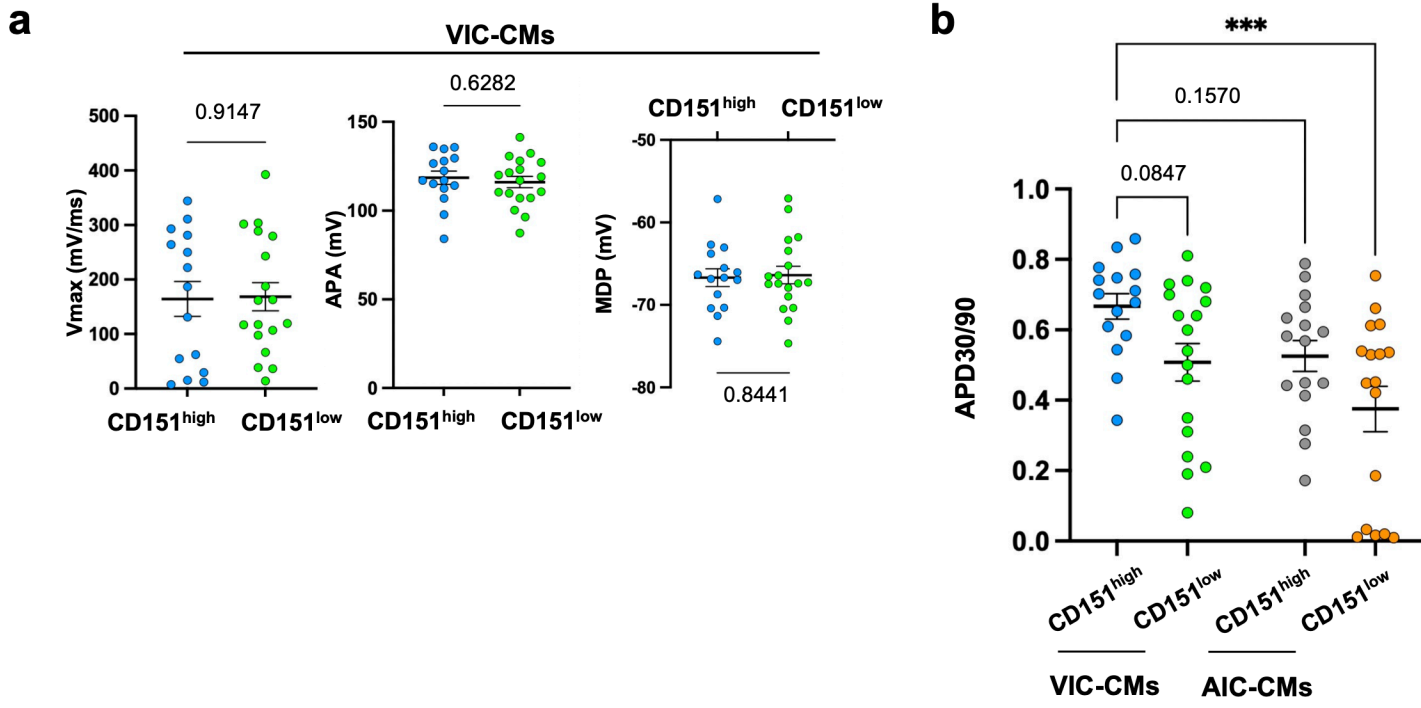

**Figure S3. Electrophysiological properties in CD151<sup>high</sup>/low AIC-CMs and ViC-CMs, related to Figure 2.**

(a) Electrophysiology measurements of V<sub>max</sub> (mV/ms), APA, and MDP in CD151<sup>high</sup> VCMs (n=15) and CD151<sup>low</sup> VCMs (n=18) from three independent differentiation experiments. Data are presented as mean ± SEM. Statistical analysis was conducted using an unpaired two-tailed t-test. (b) APD<sub>30/90</sub> of CD151<sup>high</sup> VCMs (n=15), CD151<sup>low</sup> VCMs (n=18), CD151<sup>high</sup> ACMs (n=16), and CD151<sup>low</sup> ACMs (n=17). Data are presented as mean ± SEM. Statistical analysis was conducted using one-way ANOVA followed by Dunnett's test. \*\*\* p < 0.001.

# Figure S4

## a (i) anti-CD151

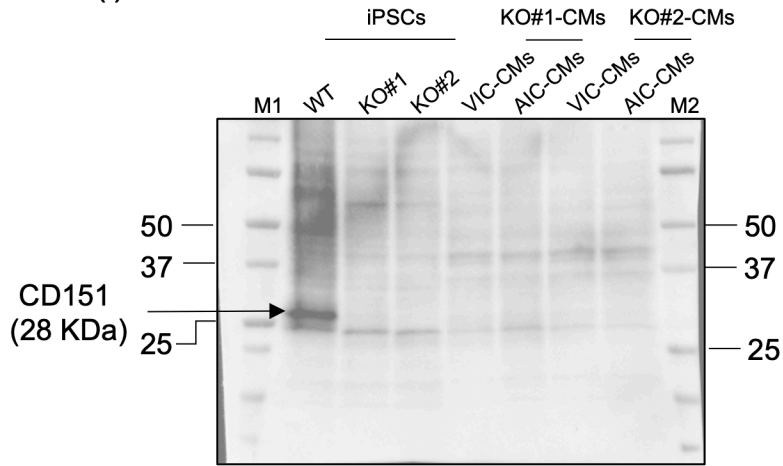

## (ii) anti-Actin

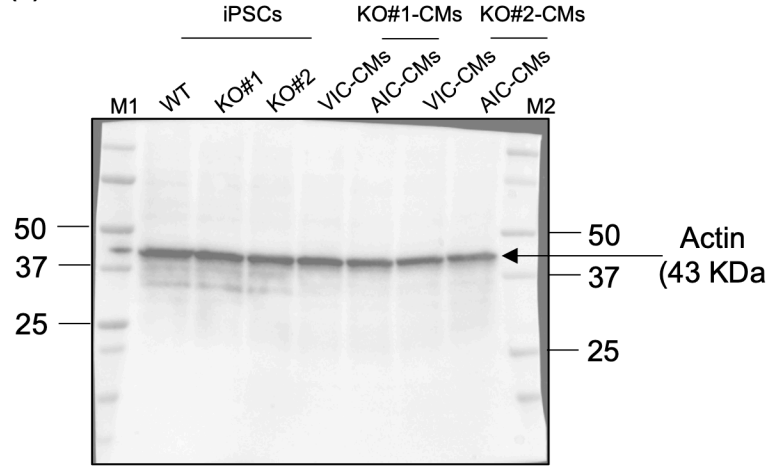

## b

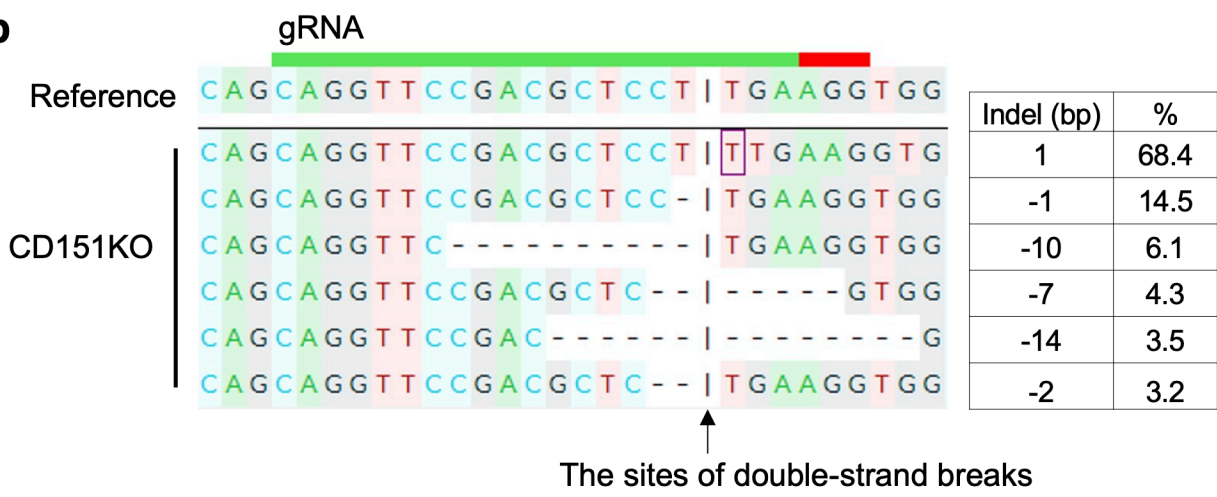

## c

### (i) *FDXR*

WT: GTA A C T G A A T C A T C T C C C G A A G C T C C T T G A A G G T G G G A G C  
 CD151KO: GTA A C T G A A T C A T C T C C C G A A G C T C C T T G A A G G T G G G A G C

### (iv) *SPINT2*

WT: G C C T C G C G T T C A G G T G C C G A C G C T C C G G G A G G G T C C G C C A  
 CD151KO: G C C T C G C G T T C A G G T G C C G A C G C T C C G G G A G G G T C C G C C A

### (ii) *MBTD1*

WT: A T A A T T T C C T T C A A G G A G C G T C T G A T C A G G A A A G C A A T G G  
 CD151KO: A T A A T T T C C T T C A A G G A G C G T C T G A T C A G G A A A G C A A T G G

### (v) *C14orf166*

WT: T C G A G A G C C G T C A A C T T G C G T C G G A A C A T G G T C C C C G C T T  
 CD151KO: T C G A G A G C C G T C A A C T T G C G T C G G A A C A T G G T C C C C G C T T

### (iii) *LYST*

WT: T C T T A G A G C C T T C A G G G A G A G T T G G A A C C A G C A T C A T T T T C C  
 CD151KO: T C T T A G A G C C T C A G G G A G A G T T G G A A C C A G C A T C A T T T T C C

## d

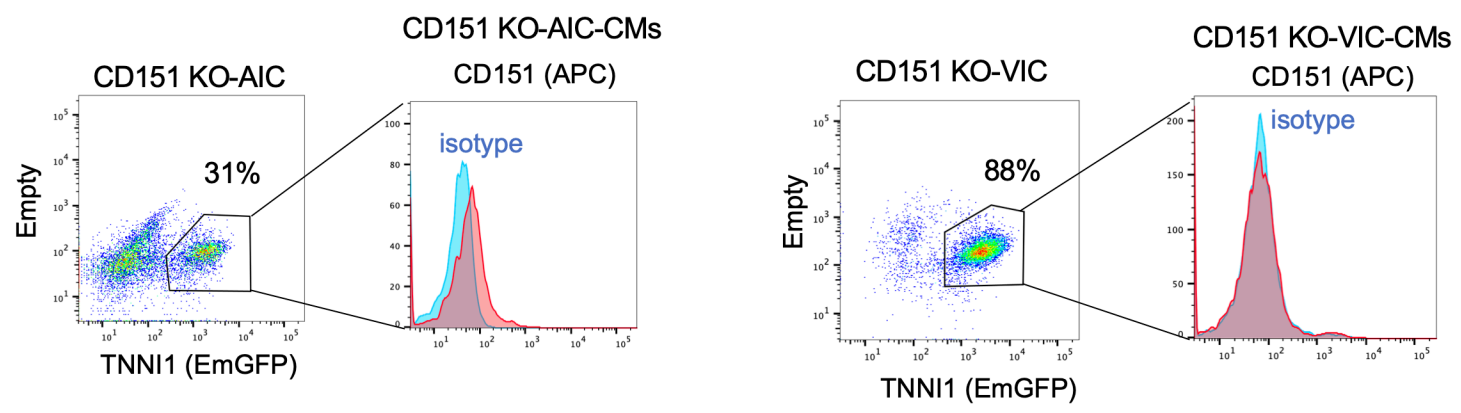

**Figure S4. CD151 KO hiPSCs differentiation, related to Figure 3.**

(a) Western blots image of CD151 expression (i) and Actin (ii) in WT-hiPSCs, CD151 KO hiPSCs, VIC-, and AIC-CMs. KO#1 hiPSCs were generated by different gRNA (5'-AACGAGAAGAAGACAACATG-3') than the one mentioned in the manuscript. Fig. 3b showed the result of KO#2 hiPSCs, and they were used for further experiments. M1 and M2 indicate different markers. (b) Sanger sequencing of a target site in the *CD151* gene. The gRNA and PAM sequences are indicated in green and red above the reference sequence, respectively. The right table shows the indel size (bp) and the population (%) of each indel observed in CD151KO hiPSCs. (c) DNA sequences of five predicted off-target genes. The black boxes indicate the off-target sequences of WT cells (TNNI1-EmGFP hiPSCs). (d) Representative flow cytometry images of day-20 AIC- (left) and VIC-EBs (right) derived from CD151 KO hiPSCs. The gating populations were TNNI1<sup>+</sup> CMs. Histogram comparing the isotype control (blue) and CD151 staining (red) are shown for each differentiation.



**Figure S5**

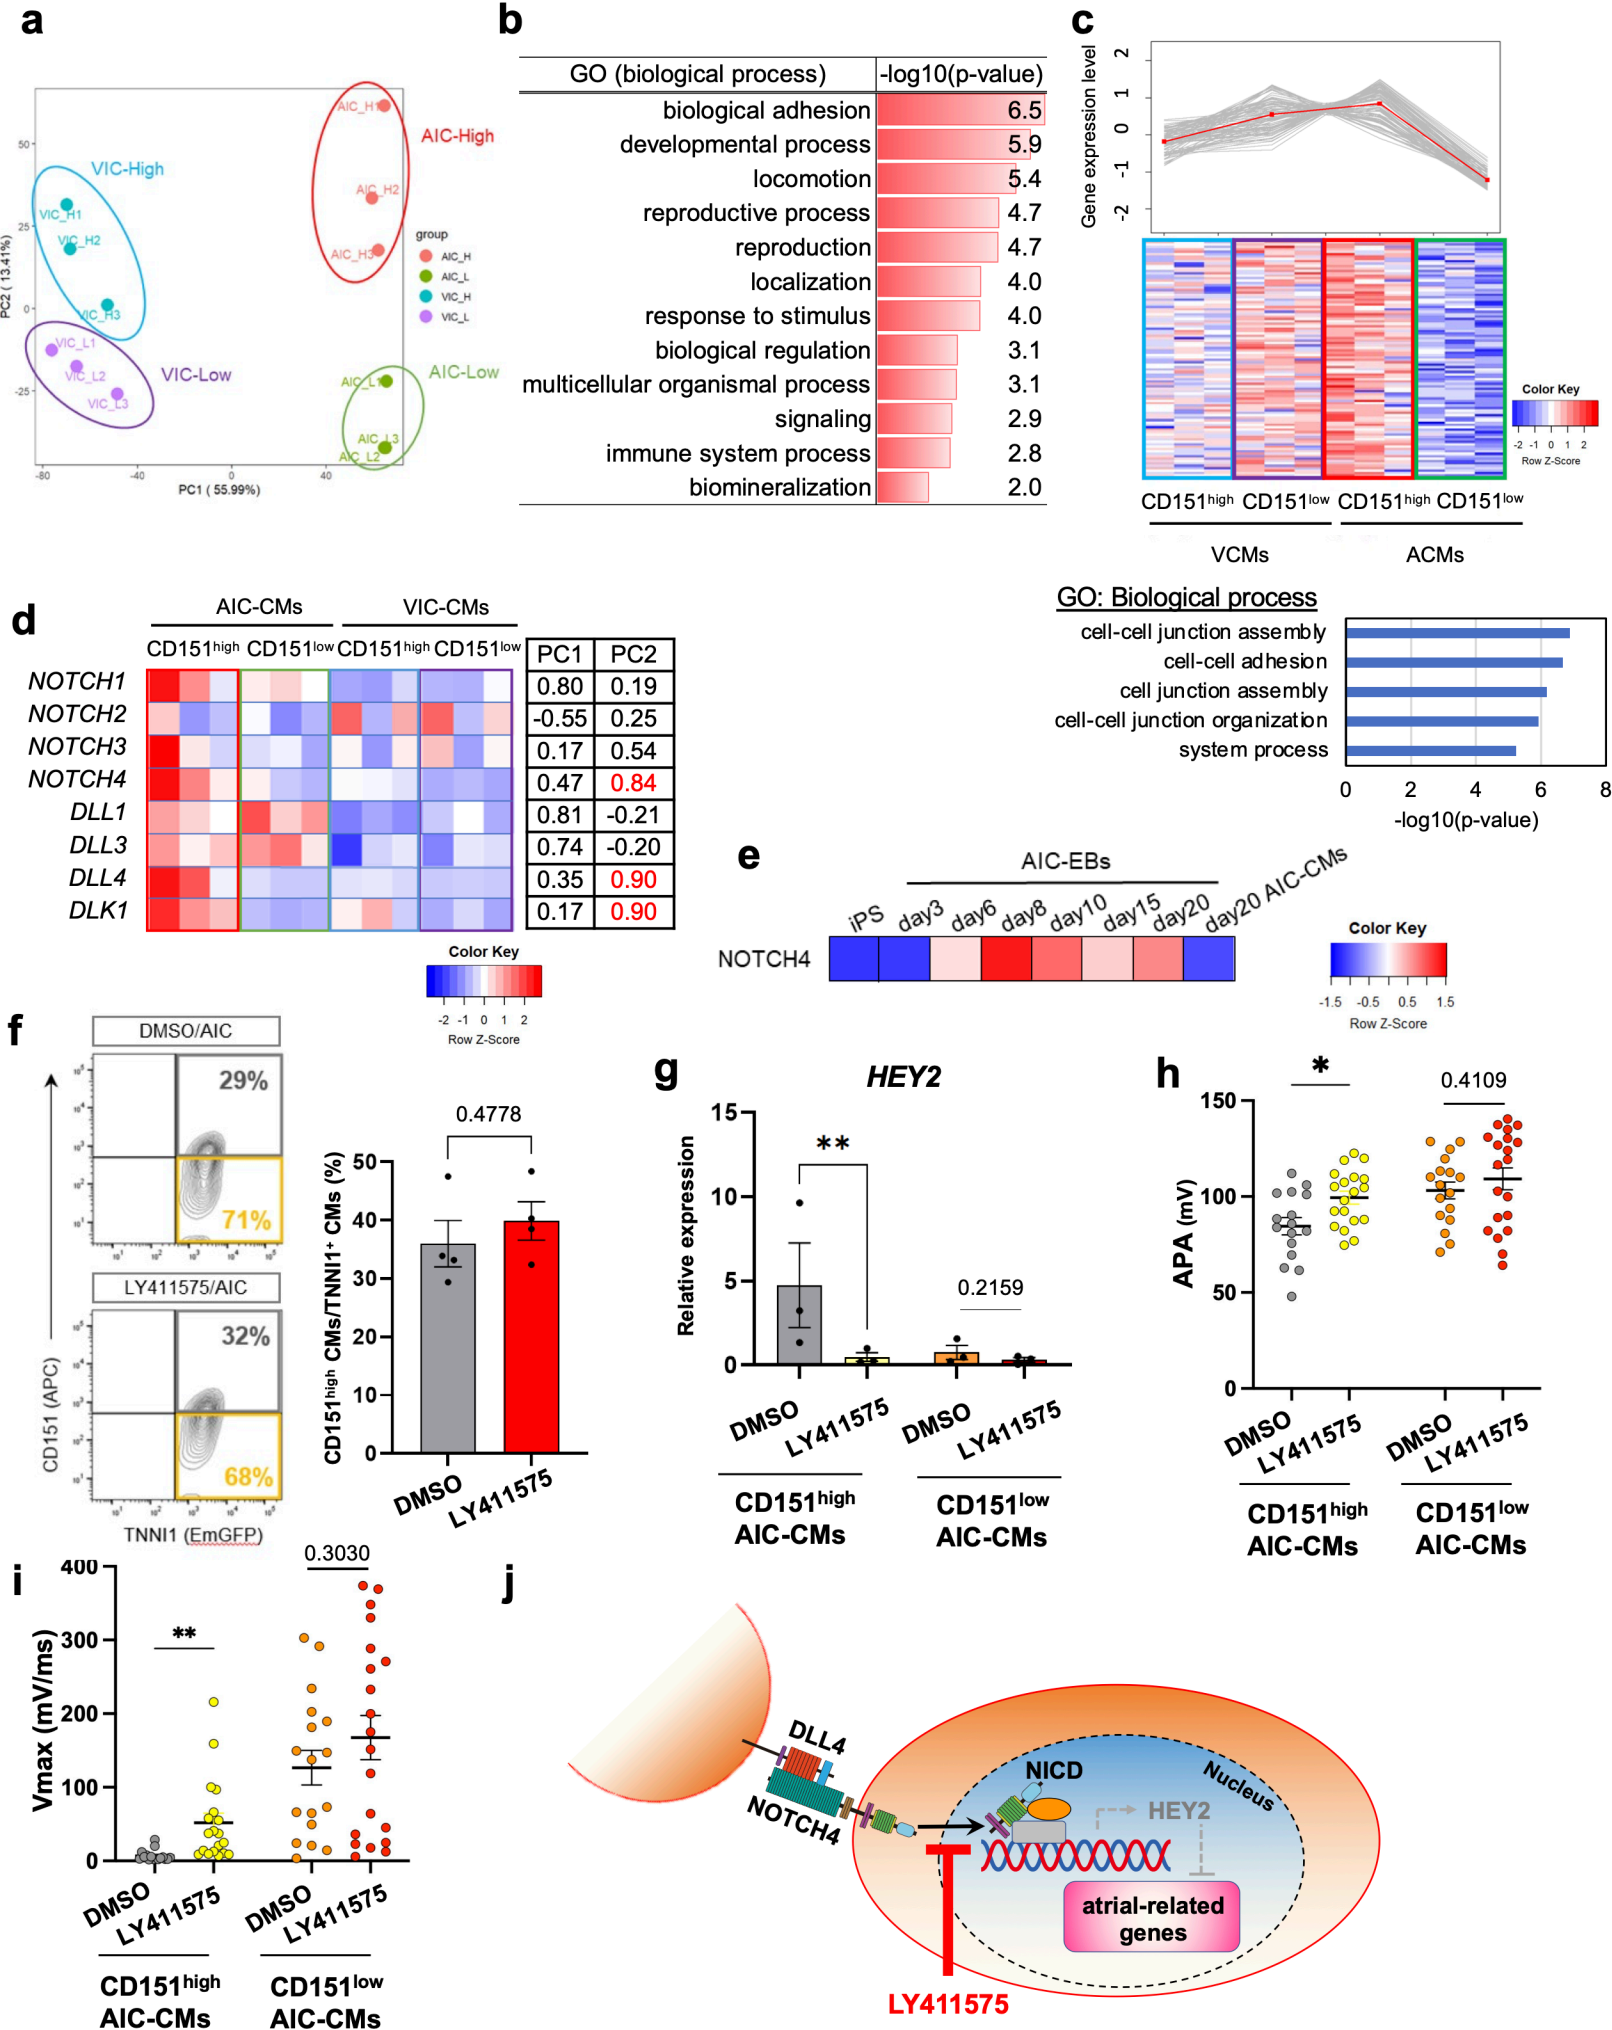

**Figure S5. Transcriptome analysis of CD151<sup>high/low</sup> CMs and Notch signaling inhibition in AIC differentiation, related to Figure 4.**

(a) PCA showing the correlation between CD151 expression and differentiation conditions. n=3 independent experiments per group. (b) GO enrichment analysis of 186 DEGs with factor loadings of PC2 < -0.8 or > 0.8 in AIC-CMs. Twelve biological processes are shown with a significance level of p < 0.05. (c) This group consisted of 88 clustered genes that showed a lower expression in CD151<sup>low</sup> AIC-CMs via hierarchical clustering of CD151<sup>high/low</sup> VIC-CMs and CD151<sup>high/low</sup> AIC-CMs. Expression patterns of each gene (grey) and the average of all 88 genes are shown above. GO enrichment (biological process) is shown below. (d) Heatmap of the expression changes of Notch-related genes in CD151<sup>high/low</sup> AIC- and VIC-CMs. The PC1 and PC2 factor loadings for each gene are shown in the table (right). (e) Heatmap of the *NOTCH4* mRNA time-course expression during AIC differentiation. (f) Representative flow cytometry images of TNNI1<sup>+</sup> CMs differentiated with DMSO (top) or LY411575 (bottom) and stained with CD151 antibody. The percentages represent gated populations. The bar graph indicates the percentage of CD151<sup>high</sup> AIC-CMs gated from TNNI1<sup>+</sup> CMs differentiated with DMSO or LY411575. n=4 independent differentiation experiments per group. Data are expressed as mean  $\pm$  SEM. Statistical analysis compared the two groups using an unpaired two-tailed t-test. (g) Relative expression of *HEY2* in CD151<sup>high/low</sup> AIC-CMs differentiated with LY411575 or DMSO as vehicle control. n=3 independent differentiation experiments per group. Data are expressed as mean  $\pm$  SEM. Statistical analysis was conducted using the paired two-tailed t-test. \*\* p < 0.01. (h) Electrophysiological measurements of APA in CD151<sup>high/low</sup> AIC-CMs differentiated with vehicle treatment (DMSO) or LY411575. CD151<sup>high</sup> AIC-CMs, DMSO (n=16) and LY411575 treatment (n=19); CD151<sup>low</sup> AIC-CMs, vehicle (DMSO) (n=17) and LY411575 treatment (n=20). Data are presented as mean  $\pm$  SEM. Statistical analysis was performed using the unpaired two-tailed t-test. \* p < 0.05. (i) Electrophysiological measurements of Vmax (mV/ms) in CD151<sup>high/low</sup> AIC-CMs differentiated with vehicle treatment (DMSO) or LY411575. CD151<sup>high</sup> AIC-CMs, DMSO (n=16) and LY411575 treatment (n=19); CD151<sup>low</sup> AIC-CMs, vehicle (DMSO) (n=17) and LY411575 treatment (n=20). Data are presented as mean  $\pm$  SEM. Statistical analysis was performed using an unpaired two-tailed t-test \*\* p < 0.01. (j) A schematic diagram of the putative atrial gene upregulation mechanism induced by Notch inhibition (LY411575). Notch signaling inhibits atrial-related gene expression by inducing *HEY2* transcription as a result of Notch intercellular domain (NICD) binding to the transcriptional activation complex in the *HEY2* promoter region. LY411575 inhibits Notch cleavage and NICD generation, thus derepressing the inhibition of atrial-related genes to induce atrial differentiation.

**Figure S6**

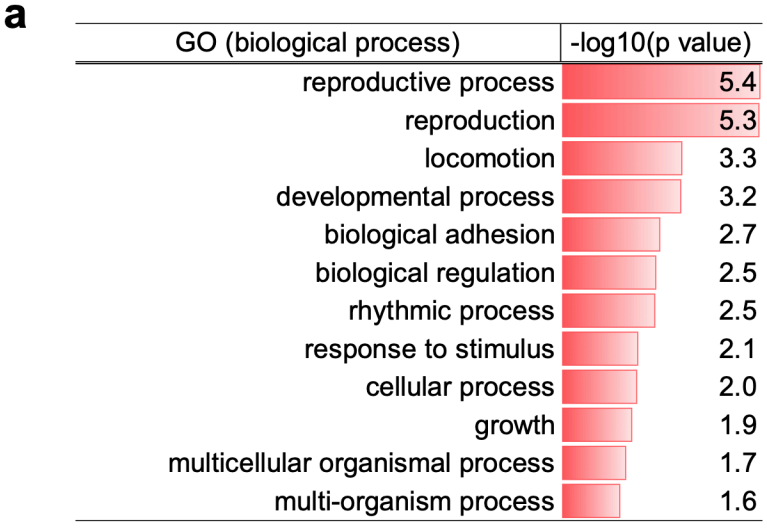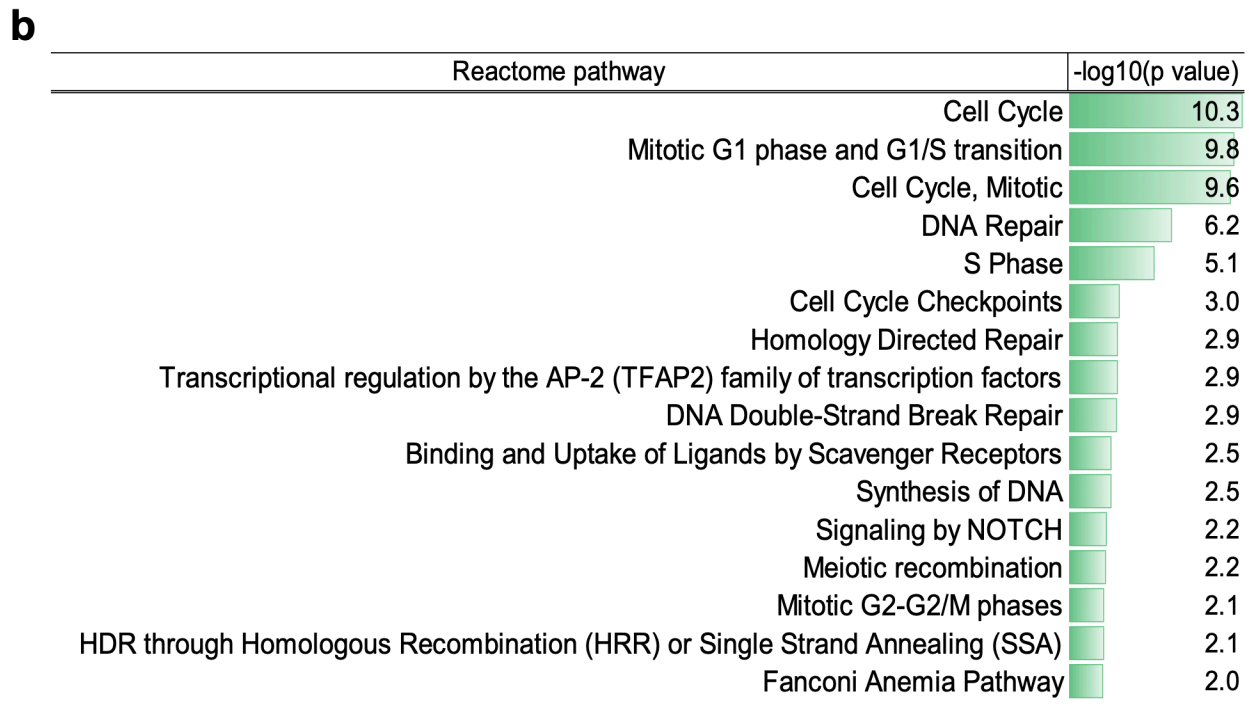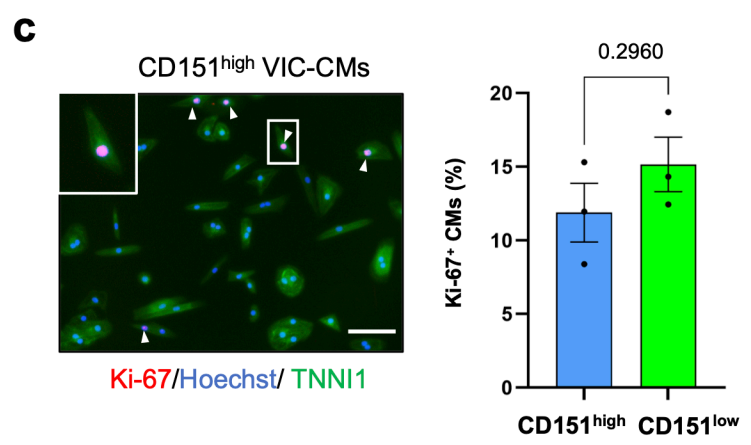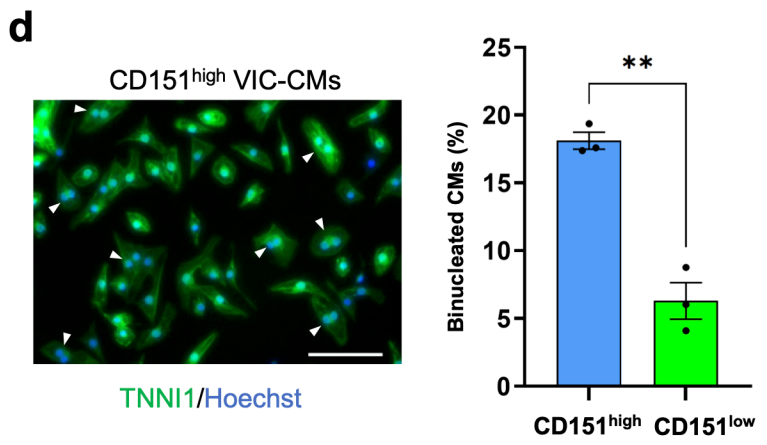

**Figure S6. Transcriptome analysis of CD151<sup>high/low</sup> VIC-CM, related to Figure 5.**

(a) GO enrichment analysis of DEGs between CD151<sup>high</sup> and CD151<sup>low</sup> VIC-CMs. Twelve biological processes are shown with a significance level of  $p < 0.05$ . (b) Reactome pathway analysis of DEGs between CD151<sup>high/low</sup> VIC-CMs. Sixteen biological processes are shown with a significance level of  $p < 0.05$ . (c) Representative immunofluorescence images of Ki-67 (red), Hoechst (blue), and TNNI1 (green) in CD151<sup>high</sup> VIC-CMs derived from the TNNI1-EmGFP reporter hiPSC line. Ki-67<sup>+</sup> CMs are indicated by the arrowheads. The inset is a high magnification image of the boxed area and shows Ki-67<sup>+</sup> CMs. Scale bar = 100  $\mu\text{m}$ . Bar graph shows percentage of Ki-67<sup>+</sup> CMs in CD151<sup>high</sup> VIC-CMs (n=1,461) and CD151<sup>low</sup> VIC-CMs (n=1,077) derived from the TNNI1-EmGFP reporter hiPSC line. n=30 images from three independent differentiation experiments. Data are expressed as mean  $\pm$  SEM of three experiments. Statistical analysis was conducted using an unpaired two-tailed t-test. (d) Representative immunofluorescence images of TNNI1 (green) and Hoechst (blue) in CD151<sup>high</sup> VIC-CMs derived from the TNNI1-EmGFP reporter hiPSC line. Binuclear CMs are indicated by the arrowheads. Scale bar = 100  $\mu\text{m}$ . Bar graph shows percentage of binuclear CMs in CD151<sup>high</sup> VIC-CMs (n=1,236) and CD151<sup>low</sup> VIC-CMs (n=720) derived from the TNNI1-EmGFP reporter hiPSC line. n=15 images from three independent differentiation experiments. Data are expressed as mean  $\pm$  SEM of three experiments. Statistical analysis was conducted using an unpaired two-tailed t-test. \*\*  $p < 0.01$ .

# Figure S7

**a**

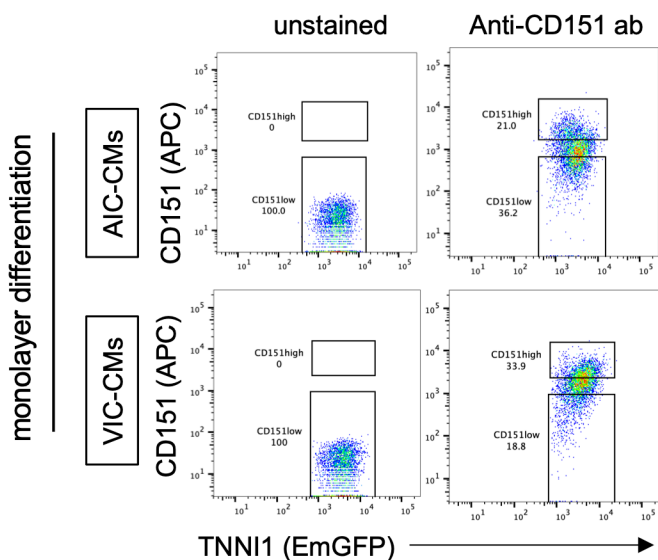

**b**

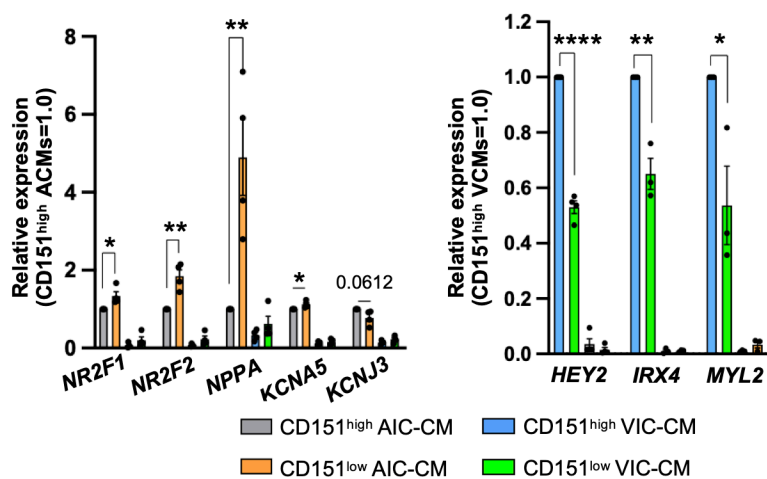

**c**

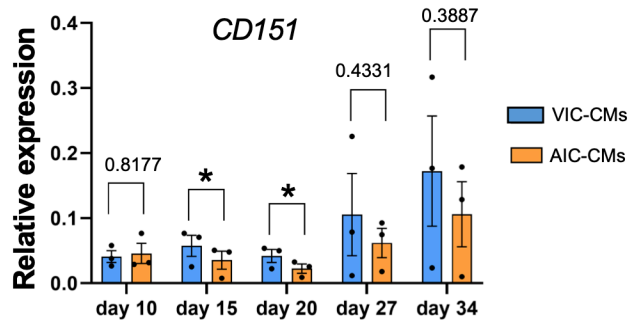

**d**

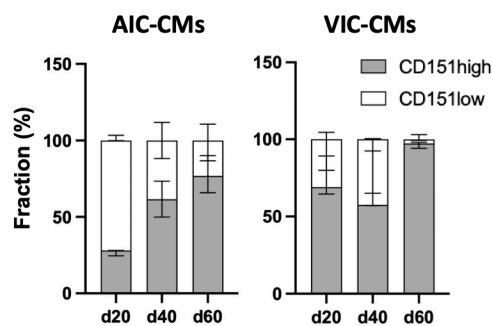

**e**

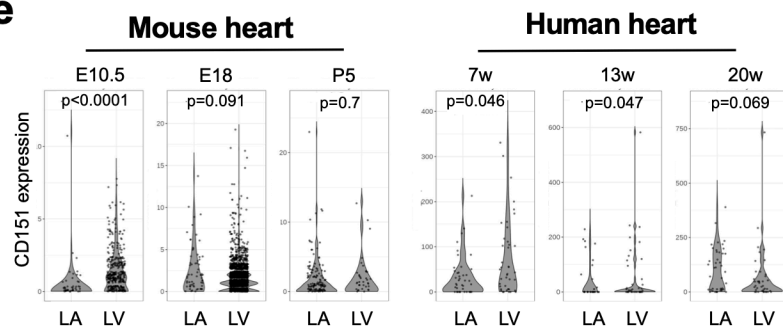

**f**

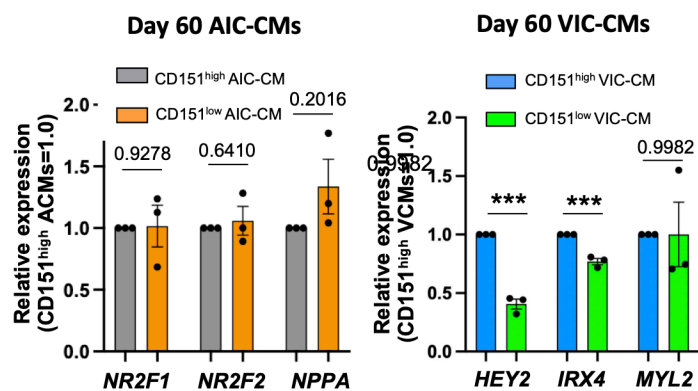

**h**

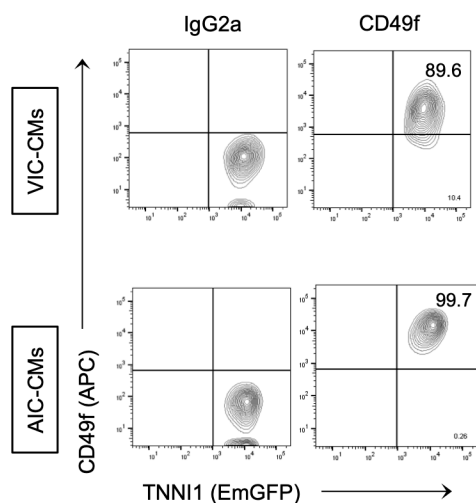

**i**

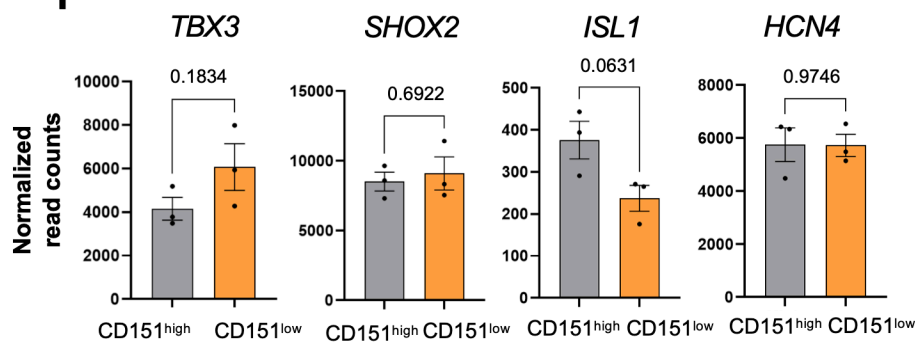

**Figure S7. CD151 selection in monolayer culture, CD151 expression over time in vitro culture and in vivo heart tissues, *ITGA6* and CD49f expression in VIC- and AIC-CMs, and sinoatrial marker genes expression in AIC-CMs.**

(a) Representative flow cytometry images of day-20 AIC- and VIC-CMs with monolayer differentiation stained with the CD151 antibody. (b) Relative expression of atrial-related genes in CD151<sup>low</sup> ACMs and CD151<sup>high/low</sup> VCMs compared to those in CD151<sup>high</sup> ACMs derived from the TNNI1-EmGFP hiPSC line with monolayer differentiation (top). Relative expression of ventricular-related genes in CD151<sup>low</sup> VCMs and CD151<sup>high/low</sup> ACMs compared to those in CD151<sup>high</sup> VCMs derived from the TNNI1-EmGFP hiPSC line with monolayer differentiation (bottom). n=3 independent experiments per group. Data are expressed as mean  $\pm$  SEM. Statistical analysis was conducted using the unpaired two-tailed t-test. \* p < 0.05, \*\* p < 0.01; \*\*\* p < 0.001, and \*\*\*\* p < 0.0001. (c) Time-course of relative *CD151* expression. n=3 independent differentiation experiments per group. Data are expressed as mean  $\pm$  SEM. Statistical analysis was conducted using a paired two-tailed t-test. \* p < 0.05. (d) The fraction of CD151<sup>high</sup> and CD151<sup>low</sup> population at day 20, day 40, and day 60 after differentiation. Data are shown as median with 95% CI. (e) *CD151* expression in the left atrium (LA) and ventricle (LV) of mouse and human across various stages derived from single-cell RNA sequence data. (f) Atrial marker genes expression (top) and ventricular genes expression (bottom) on day-60 CD151<sup>high/low</sup> ACMs and VCMs sorted on day 20. n=3 independent differentiation experiments per group. Statistical analysis was conducted using an unpaired two-tailed t-test. \*\*\* p < 0.001. (g) *ITGA6* gene expression in CD151<sup>high</sup> VCMs and CD151<sup>high/low</sup> ACMs. Statistical analysis was conducted using one-way ANOVA followed by Tukey's HSD test. \*\*\* p < 0.001 and \*\*\*\* p < 0.0001. (h) Flow cytometry images of VIC- and AIC-CMs stained with isotype control (left) and CD49f antibodies. The percentage of positive cells of CD49f in TNNI1<sup>+</sup> CMs represents the gated populations. (i) Sinoatrial marker gene expressions in CD151<sup>high/low</sup> ACMs. n=3 independent differentiation experiments per group. Statistical analysis was conducted using an unpaired two-tailed t-test.

**Figure S8**

**a**

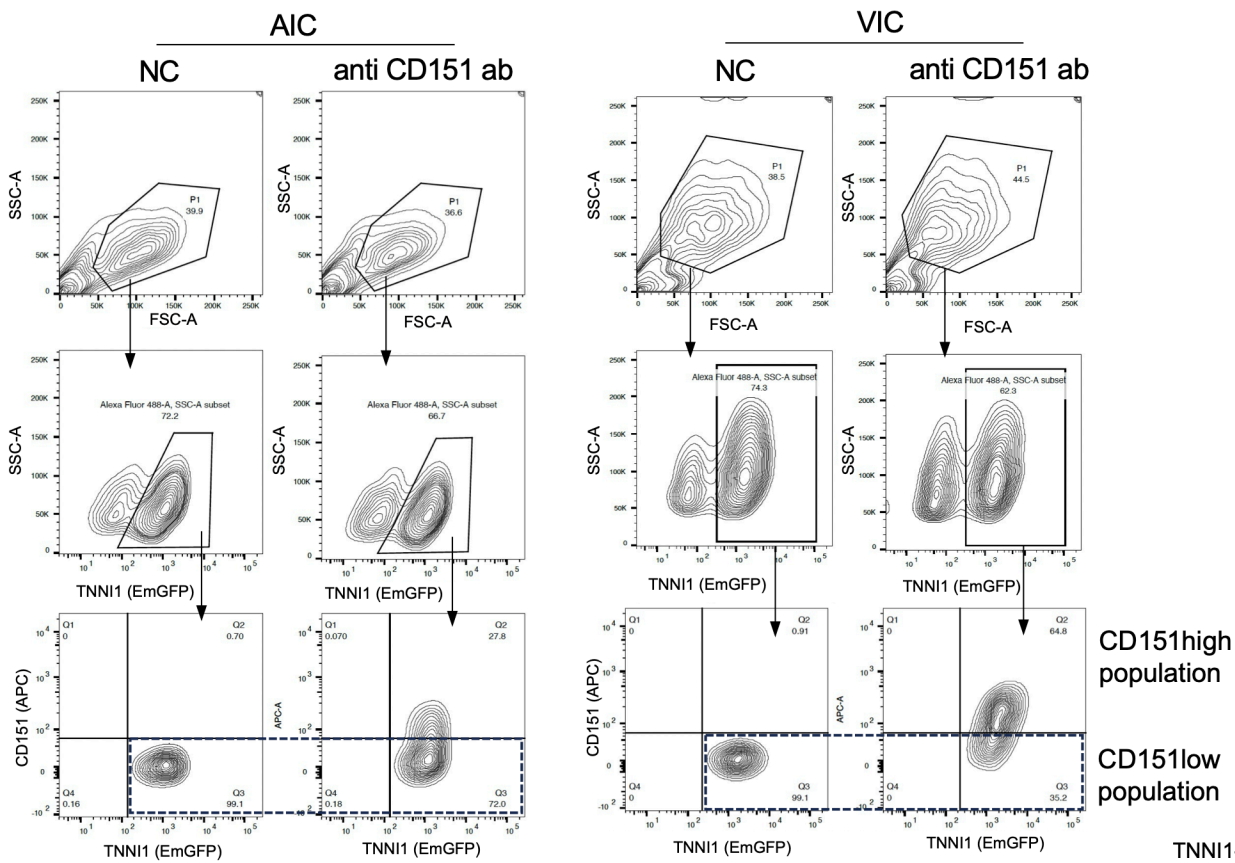

**b**

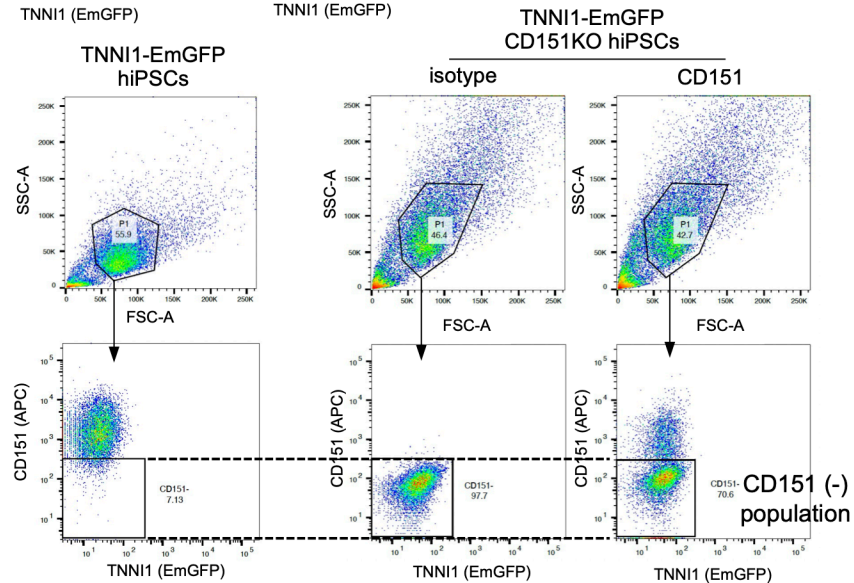

**c**

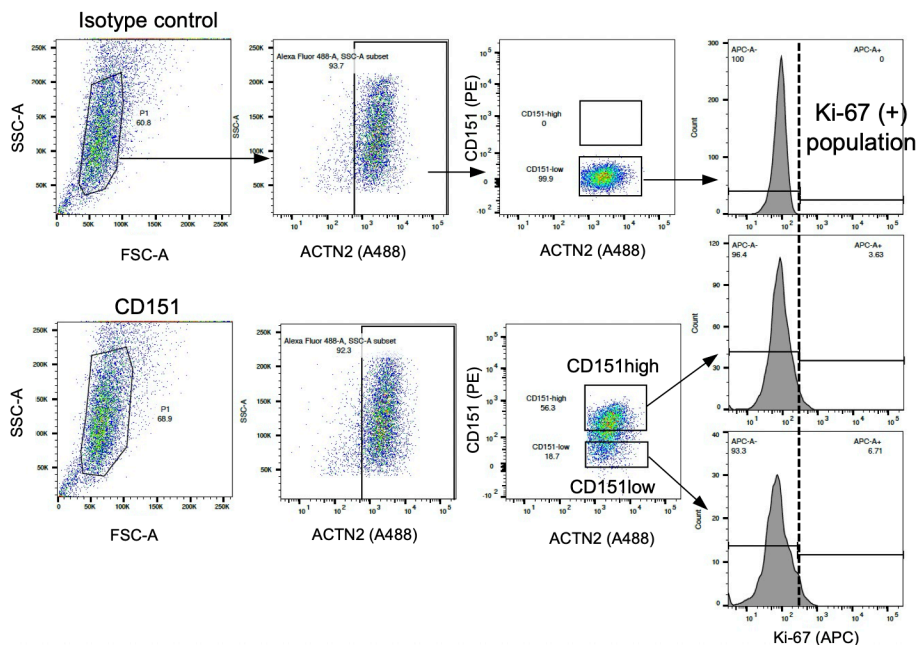

**Figure S8. Gating strategy for flow cytometry analysis.**

(a) Gating strategy for CD151<sup>high/low</sup> CMs derived from TNNI1-EmGFP hiPSCs. TNNI1-positive cells were gated as cardiomyocytes and separated by CD151 expression levels. CD151 low expressed population was determined by Negative control (NC). (b) CD151KO hiPSCs were generated by sorting the CD151-negative population as determined with the isotype control sample population. (c) 1390C1-derived CMs were gated as an ACTN2-positive population. Those CMs were categorized based on CD151 expression, and Ki-67 expressing population was analyzed in each CD151<sup>high</sup> and CD151<sup>low</sup> CMs.



**Supplementary Table 1. APD30/90 in CD151<sup>high/low</sup> AIC-CMs and VIC-CMs.**

| AIC-CMs (APD30/90) |                       |    |                      |
|--------------------|-----------------------|----|----------------------|
|                    | CD151 <sup>high</sup> |    | CD151 <sup>low</sup> |
| 1                  | 0.44                  | 1  | 0.53                 |
| 2                  | 0.28                  | 2  | 0.75                 |
| 3                  | 0.45                  | 3  | 0.61                 |
| 4                  | 0.66                  | 4  | 0.45                 |
| 5                  | 0.45                  | 5  | 0.66                 |
| 6                  | 0.17                  | 6  | 0.54                 |
| 7                  | 0.41                  | 7  | 0.19*                |
| 8                  | 0.31                  | 8  | 0.62                 |
| 9                  | 0.58                  | 9  | 0.42                 |
| 10                 | 0.59                  | 10 | 0.02*                |
| 11                 | 0.79                  | 11 | 0.54                 |
| 12                 | 0.57                  | 12 | 0.45                 |
| 13                 | 0.75                  | 13 | 0.01*                |
| 14                 | 0.70                  | 14 | 0.02*                |
| 15                 | 0.63                  | 15 | 0.01*                |
| 16                 | 0.61                  | 16 | 0.53                 |
|                    |                       | 17 | 0.03*                |

| VIC-CMs (APD30/90) |                       |     |                      |
|--------------------|-----------------------|-----|----------------------|
| no.                | CD151 <sup>high</sup> | no. | CD151 <sup>low</sup> |
| 1                  | 0.78                  | 1   | 0.08*                |
| 2                  | 0.86                  | 2   | 0.64                 |
| 3                  | 0.76                  | 3   | 0.81                 |
| 4                  | 0.61                  | 4   | 0.54                 |
| 5                  | 0.65                  | 5   | 0.73                 |
| 6                  | 0.58                  | 6   | 0.19*                |
| 7                  | 0.71                  | 7   | 0.6                  |
| 8                  | 0.54                  | 8   | 0.46                 |
| 9                  | 0.68                  | 9   | 0.68                 |
| 10                 | 0.74                  | 10  | 0.74                 |
| 11                 | 0.34                  | 11  | 0.72                 |
| 12                 | 0.75                  | 12  | 0.31                 |
| 13                 | 0.83                  | 13  | 0.21*                |
| 14                 | 0.7                   | 14  | 0.5                  |
| 15                 | 0.46                  | 15  | 0.64                 |
|                    |                       | 16  | 0.7                  |
|                    |                       | 17  | 0.24*                |
|                    |                       | 18  | 0.35                 |

\*APD30/90 < 0.3 and Vmax > 10 indicates atrial properties of APs.

## Supplementary Table 2. List of Taqman probes used in this study.

| Target gene | Assay ID      |
|-------------|---------------|
| NR2F1       | Hs00818842_m1 |
| NR2F2       | Hs00819630_m1 |
| NPPA        | Hs00383230_g1 |
| KCNA5       | Hs00969279_s1 |
| KCNJ3       | Hs00158421_m1 |
| HEY1        | Hs01114113_m1 |
| HEY2        | Hs01012057_m1 |
| IRX4        | Hs00212560_m1 |
| MYL2        | Hs00166405_m1 |
| NOTCH4      | Hs00965889_m1 |
| DLL4        | Hs00184092_m1 |
| TBX5        | Hs00361155_m1 |
| MYL7        | Hs01085598_g1 |
| GAPDH       | Hs99999905_m1 |

### Supplementary Table 3. List of primers used for Sanger sequencing.

| Target      | Sequences (5' to 3') |
|-------------|----------------------|
| CD151_F     | ACCCTCCCTGAAGCTTTCTT |
| CD151_R     | CAGATGCGATGACCTTTGTG |
| FDXR_F      | GATGGAAGAAGGGGAGCAGT |
| FDXR_R      | GGACCTCTGTCAGCAACGTA |
| MBTD1_F     | TGTAAAGCTGACGGAACACG |
| MBTD1_R     | CCCACCTGAAAAATCTGGAA |
| LYST_F      | TTTGAGGTGTTTTGCATTGG |
| LYST_R      | GTGGCCCATGAGCACTTAAA |
| SPINT2_F    | CGTGGATGCTGCGTTCTC   |
| SPINT2_R    | GGGAGCCGCTTCCAATAG   |
| C14orf166_F | GCTTTAAAGGCGGGAAGG   |
| C14orf166_R | ACCGCTTTTAAGCCACGATT |
